# Supplementary material
Source: publisher site journal article supplement (https://www.dovepress.com/article/379431)

Supplementary Figure 1: The inner wall of the full-visualized trepan is graduated, and the distance between each two scale lines is 2 mm, which makes it easy for the surgeon to control the depth of the full-visualized trepan into the bone.

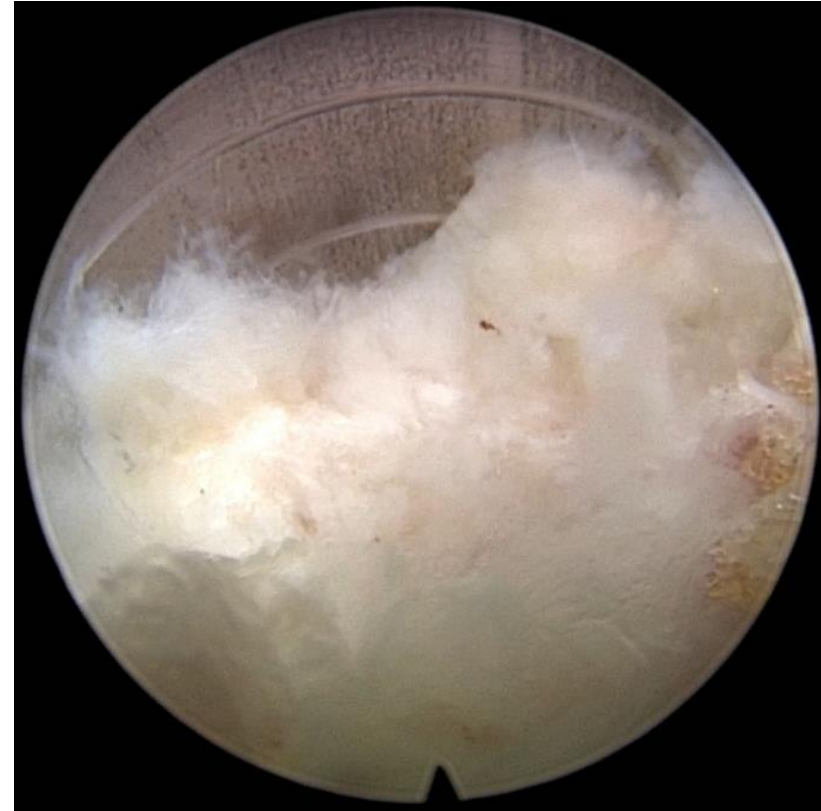

Supplement: Supplementary file 1 [file get_supplementary_file.php]
